# Supplementary material for: Metal center regulation of the porphyrin unit in covalent organic polymers for boosting the photocatalytic CO2 reduction activity
Source: Royal Society of Chemistry journal article supplement (doi:10.1039/d2cy01473d), 2022-01-01
Supplement: d2cy01473d1.pdf [file d2cy01473d1.pdf]

## Electronic Supplementary Information

### **Metal center regulation of porphyrin unit in covalent organic polymer for boosting the photocatalytic CO<sub>2</sub> reduction activity†**

Shengtao Chen,<sup>a</sup> Meijing Liao,<sup>b</sup> Xinming Li,<sup>a</sup> Renjie Li,<sup>a</sup> Jin Zhang,<sup>\*a</sup> Yuexing Zhang<sup>\*b</sup> and Tianyou Peng<sup>\*a</sup>

<sup>a</sup> *College of Chemistry and Molecular Sciences, Engineering Research Center of Organosilicon Compounds & Materials, Wuhan University, Wuhan 430072, PR China*

<sup>b</sup> *College of Chemistry and Chemical Engineering, Hubei University, Wuhan 430062, PR China.*

\* Corresponding authors.

*E-mail:* typeng@whu.edu.cn (T. Peng). ORCID: 0000-0002-2527-7634; jzhang@whu.edu.cn (J. Zhang); zhangyuexing@sdu.edu.cn (Y. Zhang).

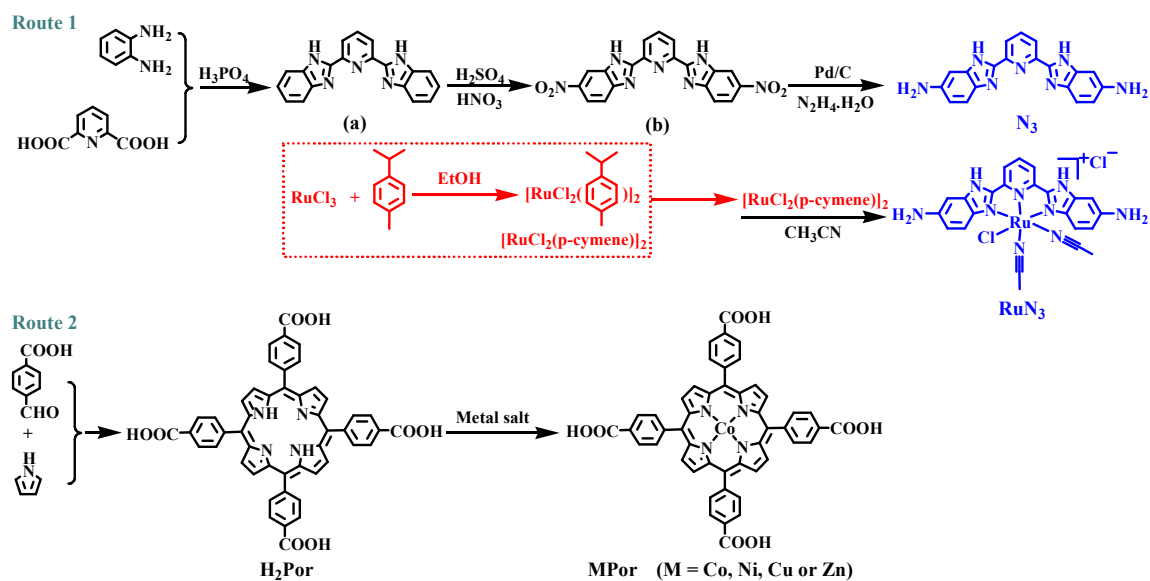

**Scheme S1** Synthetic routes of 2,6-bis(5-amino-benzimidazol-2-yl)pyridine Ru(II) pincer complex ( $\text{RuN}_3$ ) monomer and *meso*-tetrakis(4-chlorobenzoyl)porphyrin (MPor, M = H<sub>2</sub>, Co, Ni, Cu or Zn) monomers.

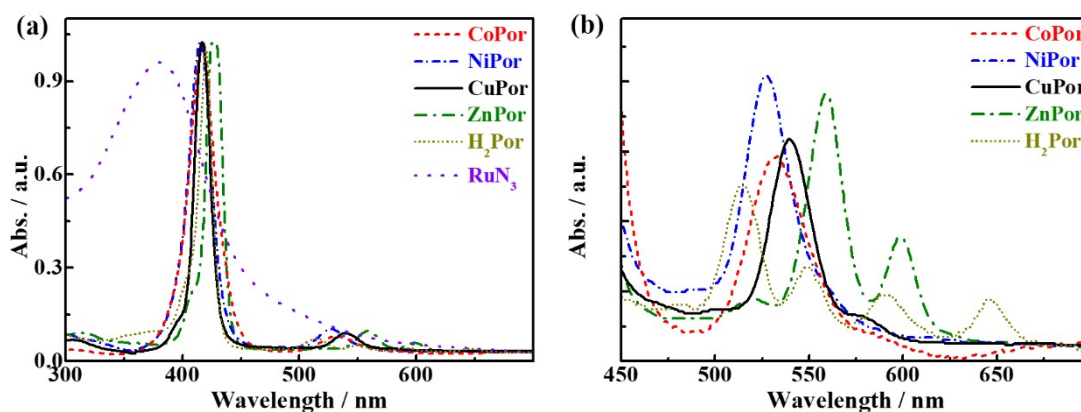

**Fig. S1** (a) UV-Vis absorption spectra of the MPor and  $\text{RuN}_3$  monomers. (b) Enlarged UV-Vis absorption spectra in the range of 450-700 nm of the MPor monomers.

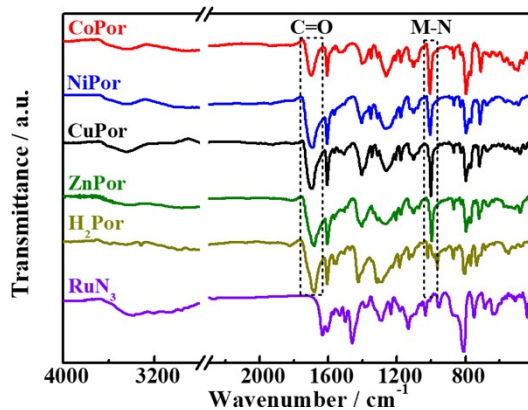

**Fig. S2** FT-IR spectra of the MPor and  $\text{RuN}_3$  monomers.

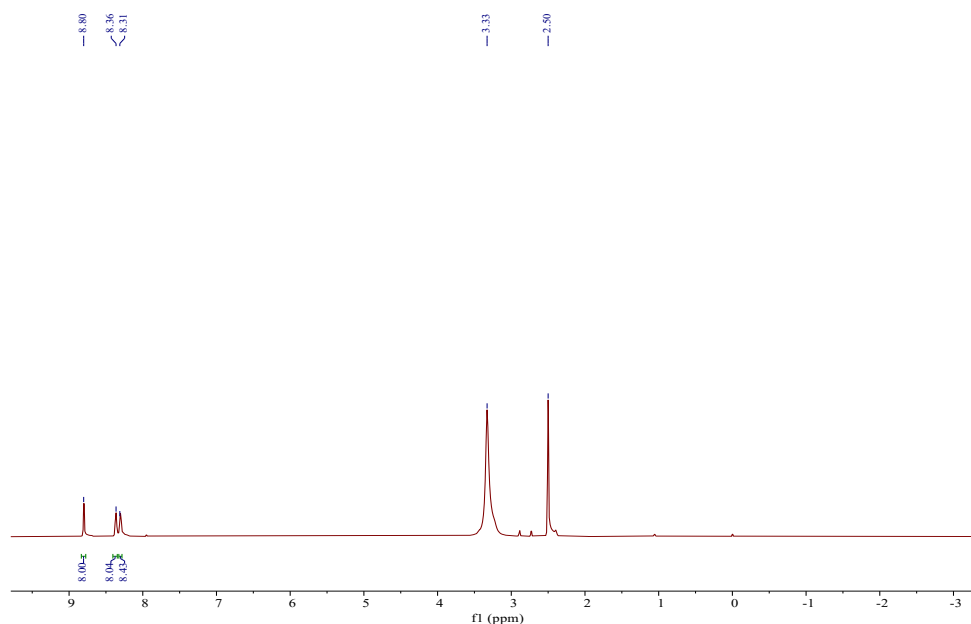

**Fig. S3**  $^1\text{H}$  NMR ( $\text{DMSO-}d_6$ ) spectrum of the ZnPor monomer.

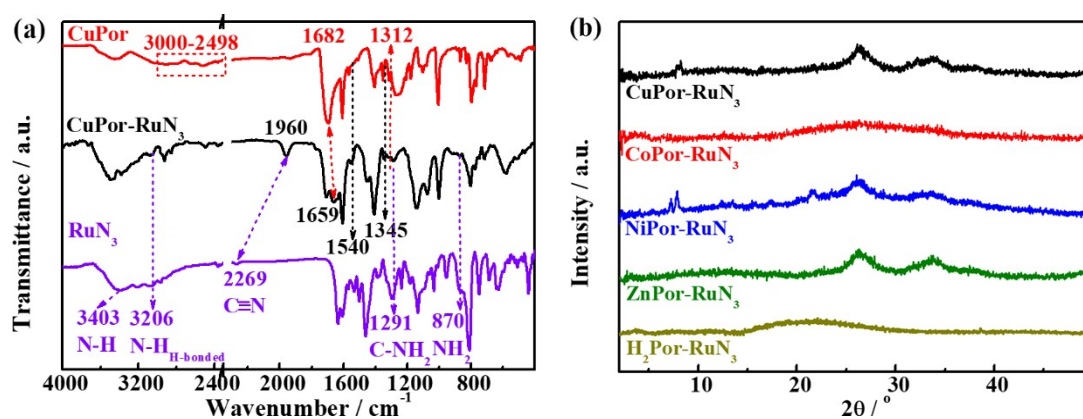

**Fig. S4** (a) FT-IR spectra of the CuPor- $\text{RuN}_3$  COP and its monomers (CuPor and  $\text{RuN}_3$ ). (b) XRD patterns of the MPor- $\text{RuN}_3$  COPs.

**Table S1** Elemental analysis results of the MPor- $\text{RuN}_3$  COPs.\*

| Polymer                          | C (%)         | H (%)       | N (%)         | M <sup>a</sup> (%) | Ru <sup>a</sup> (%) |
|----------------------------------|---------------|-------------|---------------|--------------------|---------------------|
| CoPor- $\text{RuN}_3$            | 57.28 (57.37) | 3.31 (3.26) | 15.51 (15.67) | 2.76 (3.00)        | 9.51 (10.30)        |
| NiPor- $\text{RuN}_3$            | 57.51 (57.35) | 3.27 (3.25) | 15.42 (15.66) | 3.17 (3.00)        | 9.91 (10.30)        |
| CuPor- $\text{RuN}_3$            | 57.46 (57.21) | 3.29 (3.25) | 15.38 (15.62) | 3.11 (3.20)        | 9.72 (10.20)        |
| ZnPor- $\text{RuN}_3$            | 57.29 (57.16) | 3.30 (3.24) | 15.35 (15.61) | 3.06 (3.30)        | 9.63 (10.20)        |
| $\text{H}_2$ Por- $\text{RuN}_3$ | 58.89 (59.03) | 3.61 (3.45) | 16.07 (16.21) | --                 | 9.84 (10.60)        |

\* Data in parentheses are theoretic ones calculated using following formula: MPor- $\text{RuN}_3$ :  $[1*(\text{MPor}) + 2*(\text{RuN}_3) + 4*(\text{H}_2\text{O})] / 3 = \text{C}_{31.3}\text{H}_{21.3}\text{N}_{7.3}\text{O}_{1.3}\text{Ru}_{2/3}\text{M}_{1/3}\text{Cl}_{1.3}$ ;  $\text{H}_2$ Por- $\text{RuN}_3$ :  $[1*(\text{H}_2\text{Por}) + 2*(\text{RuN}_3) - 4*(\text{H}_2\text{O})] / 3 = \text{C}_{31.3}\text{H}_{22}\text{O}_{1.3}\text{Ru}_{2/3}\text{Cl}_{1.3}$ .

<sup>a</sup> Metal contents were determined using an IRIS Intrepid II XSP inductively coupled plasma-atomic emission spectrometry (ICP-AES).

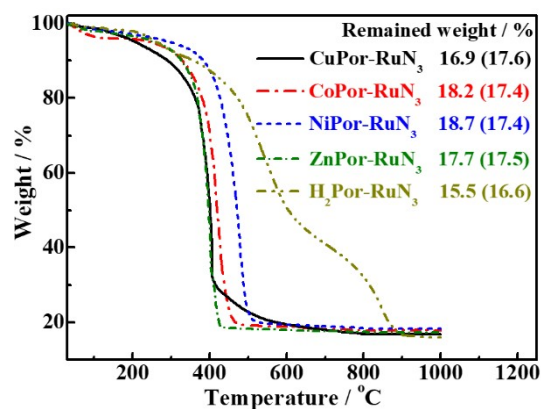

**Fig. S5** TG curves of the MPor-RuN<sub>3</sub> COPs in air. Insets are the remained weight percentages, whereby the data in parentheses are the corresponding theoretic values calculated according to their respective formula shown in Table S1.

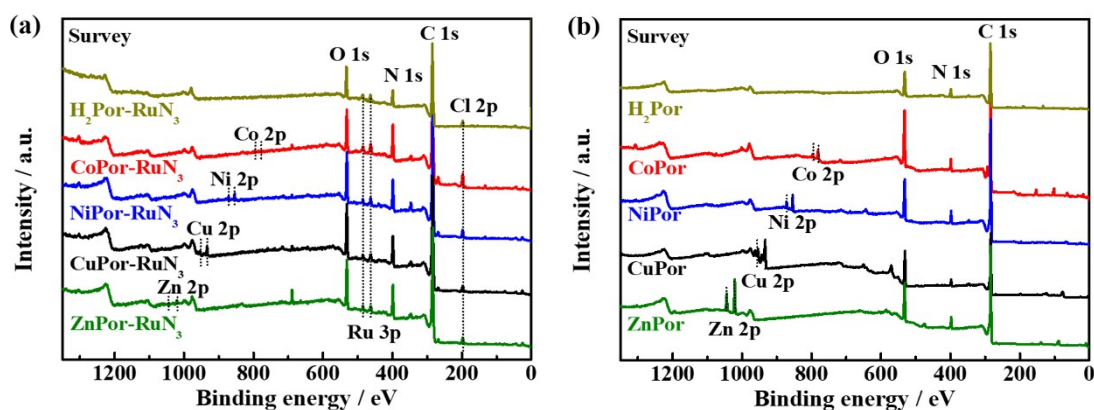

**Fig. S6** Survey XPS spectra of the MPor-RuN<sub>3</sub> COPs (a) and their corresponding MPor monomers (b).

**Table S2** Band positions of UV-vis absorption spectra of the MPor monomers and MPor-RuN<sub>3</sub> COPs

| MPor               | B-band / nm | Q-band / nm        | MPor-RuN <sub>3</sub> COP           | B-band / nm | Q-band / nm        |
|--------------------|-------------|--------------------|-------------------------------------|-------------|--------------------|
| H <sub>2</sub> Por | 420         | 515, 549, 591, 646 | H <sub>2</sub> Por-RuN <sub>3</sub> | ~472        | 519, 555, 592, 647 |
| CoPor              | 417         | 532, 575           | CoPor-RuN <sub>3</sub>              | ~464        | 550, 601           |
| NiPor              | 415         | 527                | NiPor-RuN <sub>3</sub>              | ~469        | 529                |
| CuPor              | 417         | 540, 578           | CuPor-RuN <sub>3</sub>              | ~441        | 543, 594           |
| ZnPor              | 427         | 524, 559, 599      | ZnPor-RuN <sub>3</sub>              | 457         | 524, 562, 606, 652 |

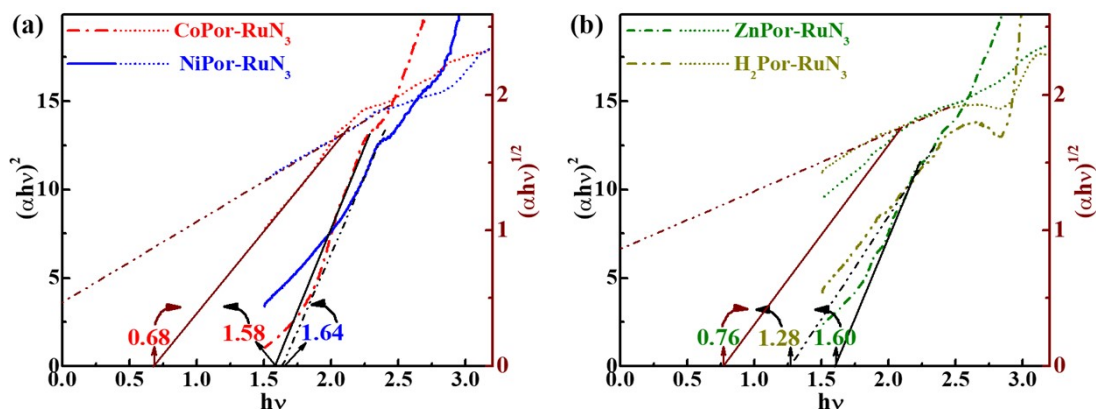

Fig. S7  $(\alpha h\nu)^2$  [or  $(\alpha h\nu)^{1/2}$ ] vs.  $h\nu$  plots derived from the corresponding DRS spectra of the MPor-RuN<sub>3</sub> COPs. Obviously, it is more reasonable to calculate the optical band gaps with the  $(\alpha h\nu)^2$  vs.  $h\nu$  plots.

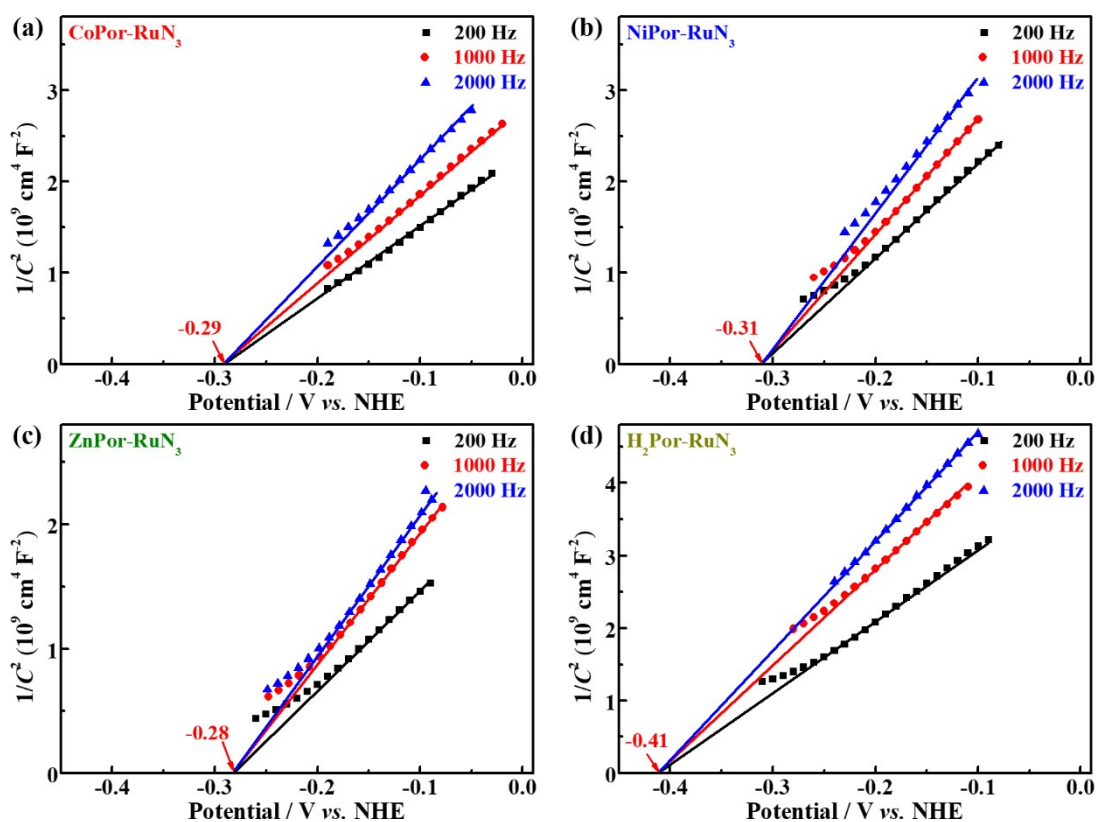

Fig. S8 Mott-Schottky plots of the MPor-RuN<sub>3</sub> COPs.

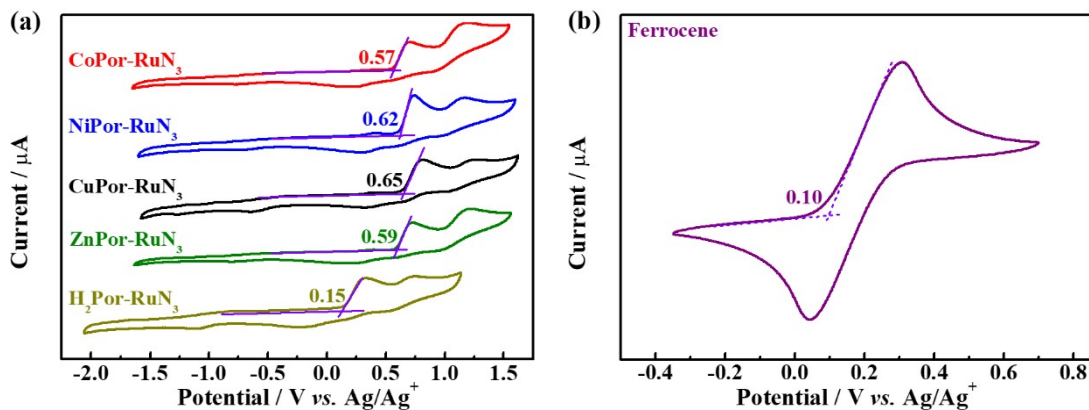

Fig. S9 Cyclic voltammogram (CV) plots of the MPor-RuN<sub>3</sub> COPs (a) and ferrocene reference (b).

**Table S3** Electrochemical properties and energy band levels of MPor-RuN<sub>3</sub> COPs

| Sample                              | $E_g$ / eV | $E_{CB}$ / V vs. NHE | $E_{VB}$ / V vs. NHE | $E_{HOMO}$ / V vs. NHE |
|-------------------------------------|------------|----------------------|----------------------|------------------------|
| CuPor-RuN <sub>3</sub>              | 1.69       | -0.42                | 1.27                 | 1.29                   |
| CoPor-RuN <sub>3</sub>              | 1.58       | -0.39                | 1.19                 | 1.21                   |
| NiPor-RuN <sub>3</sub>              | 1.64       | -0.41                | 1.24                 | 1.26                   |
| ZnPor-RuN <sub>3</sub>              | 1.60       | -0.38                | 1.22                 | 1.23                   |
| H <sub>2</sub> Por-RuN <sub>3</sub> | 1.28       | -0.51                | 0.77                 | 0.79                   |

**Table S4** Summary of CO<sub>2</sub>RR performances of various polymer-, MOF- or COF-based photocatalysts

| Catalyst                               | Sacrificial agent                | Solvent                              | $\lambda$ (nm) | CO yield / $\mu\text{mol g}^{-1} \text{h}^{-1}$ | CO selectivity / % | Ref. |
|----------------------------------------|----------------------------------|--------------------------------------|----------------|-------------------------------------------------|--------------------|------|
| MIL-101-Cr-EN                          | TEOA                             | CH <sub>3</sub> CN                   | 200-850        | 47.2                                            | 96.5               | 1    |
| OXD-TPA                                | H <sub>2</sub> O                 | H <sub>2</sub> O                     | $\geq 420$     | 37.15                                           | $\sim 100$         | 2    |
| MOF-525-Co                             | TEOA                             | CH <sub>3</sub> CN                   | 400-800        | 200.6                                           | 85.4               | 3    |
| Ag $\subset$ Re3-MOF-16 nm             | TEA                              | CH <sub>3</sub> CN/H <sub>2</sub> O  | 400-700        | 0.098                                           | --                 | 4    |
| ZrPP-1-Co                              | TEOA                             | CH <sub>3</sub> CN                   | $\geq 420$     | 14                                              | 96.4               | 5    |
| Re/Bp-PMO                              | TEOA                             | CH <sub>3</sub> CN                   | $\geq 280$     | 25.8                                            | --                 | 6    |
| PEosinY-1                              | --                               | H <sub>2</sub> O                     | $\geq 420$     | 33                                              | 92                 | 7    |
| TTCOF-Zn/Ni/Cu                         | --                               | H <sub>2</sub> O                     | 420-800        | 2.06/0.08/1.44                                  | $\sim 100$         | 8    |
| TAPBB-COF                              | --                               | H <sub>2</sub> O                     | 200-1000       | 24.6                                            | 95.6               | 9    |
| Ru-MOF                                 | TEOA                             | CH <sub>3</sub> CN                   | 420-800        | 67.5 (HCOO <sup>-</sup> )                       | --                 | 10   |
| Co-POM                                 | TEOA                             | CH <sub>3</sub> CN                   | 400-800        | 17.0                                            | 80                 | 11   |
| BIF-20@g-C <sub>3</sub> N <sub>4</sub> | TEOA                             | CH <sub>3</sub> CN                   | 400-800        | 53.9                                            | 77.6               | 12   |
| Au-NC@UiO-68-NHC                       | CH <sub>3</sub> OH               | CH <sub>3</sub> CN                   | 300-800        | 57.6                                            | 84                 | 13   |
| UiO-66/CNNS                            | TEOA                             | CH <sub>3</sub> CN                   | 400-800        | 9.9                                             | 100                | 14   |
| Pt/NH <sub>2</sub> -MIL-125(Ti)        | TEOA                             | CH <sub>3</sub> CN                   | 420-800        | 32.4 (HCOO <sup>-</sup> )                       | 100                | 15   |
| Pt@NH <sub>2</sub> -UiO-68             | TEOA                             | --                                   | 400-780        | 66.7                                            | 100                | 16   |
| Au/PPF-3                               | C <sub>2</sub> H <sub>5</sub> OH | CH <sub>3</sub> CN                   | $\geq 400$     | 42.7 (HCOO <sup>-</sup> )                       | 100                | 17   |
| UiO-68-OCH <sub>3</sub>                | TEOA                             | --                                   | 400-780        | 19.7                                            | --                 | 18   |
| CPOP-30-Re                             | TEOA                             | CH <sub>3</sub> CN                   | $\geq 390$     | 623                                             | 97.8               | 19   |
| Re-Bpy-sp <sup>2</sup> c-COF           | TEOA                             | CH <sub>3</sub> CN                   | $\geq 420$     | 1040                                            | 81                 | 20   |
| Cp*Rh@PerBpyCMP                        | TEOA, BIH                        | CH <sub>3</sub> CN                   | 420-950        | 700                                             | 100                | 21   |
| CoPcPDA-CMP NSs                        | H <sub>2</sub> O                 | --                                   | $\geq 400$     | 14.27                                           | 92                 | 22   |
| Co@COP-30                              | TEOA                             | H <sub>2</sub> O, CH <sub>3</sub> CN | $\geq 400$     | 506                                             | 94                 | 23   |
| ZnPor@Re                               | BIH                              | DMF, TEOA                            | 400-800        | 1379                                            | 99.8               | 24   |
| PQD/PES                                | H <sub>2</sub> O                 | --                                   | AM1.5G         | 32.45                                           | --                 | 25   |
| POSS-Re-2                              | BIH                              | DMF, TEOA                            | $\geq 400$     | 218.2                                           | 33.8               | 26   |
| CoPor-RuN <sub>3</sub> COP             | BIH                              | DMF                                  | $\geq 400$     | 37.1                                            | 96                 | 27   |
| CuPor-RuN <sub>3</sub> COP             | BIH                              | CH <sub>3</sub> CN                   | 400-850        | 74.3                                            | 100                | This |
| CuPor-RuN <sub>3</sub> COP             | BIH                              | CH <sub>3</sub> CN                   | 300-850        | 143.7                                           | 100                | work |

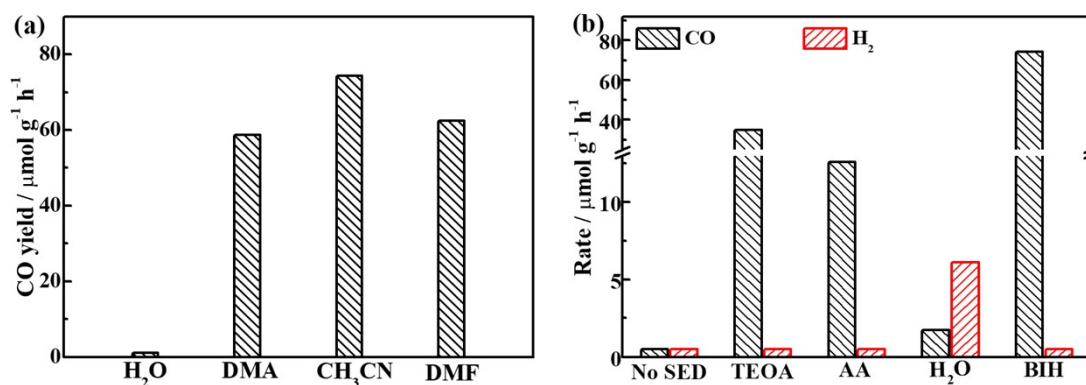

**Fig. S10** Effects of solvents (a) and sacrificial electron donors (b) on the photocatalytic CO<sub>2</sub>RR activity of the CuPor-RuN<sub>3</sub> COP under visible light ( $\lambda \geq 400 \text{ nm}$ ) irradiation.

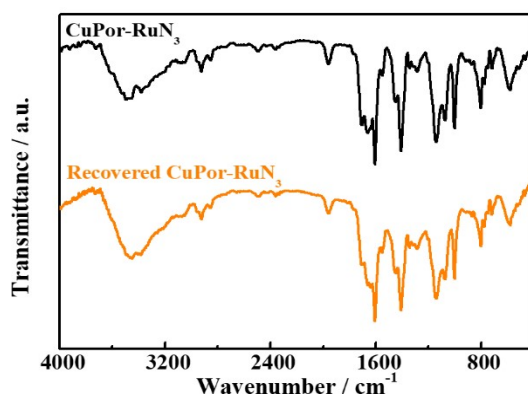

**Fig. S11** FT-IR spectra of the CuPor-RuN<sub>3</sub> COP before and after the 20 h photoreaction.

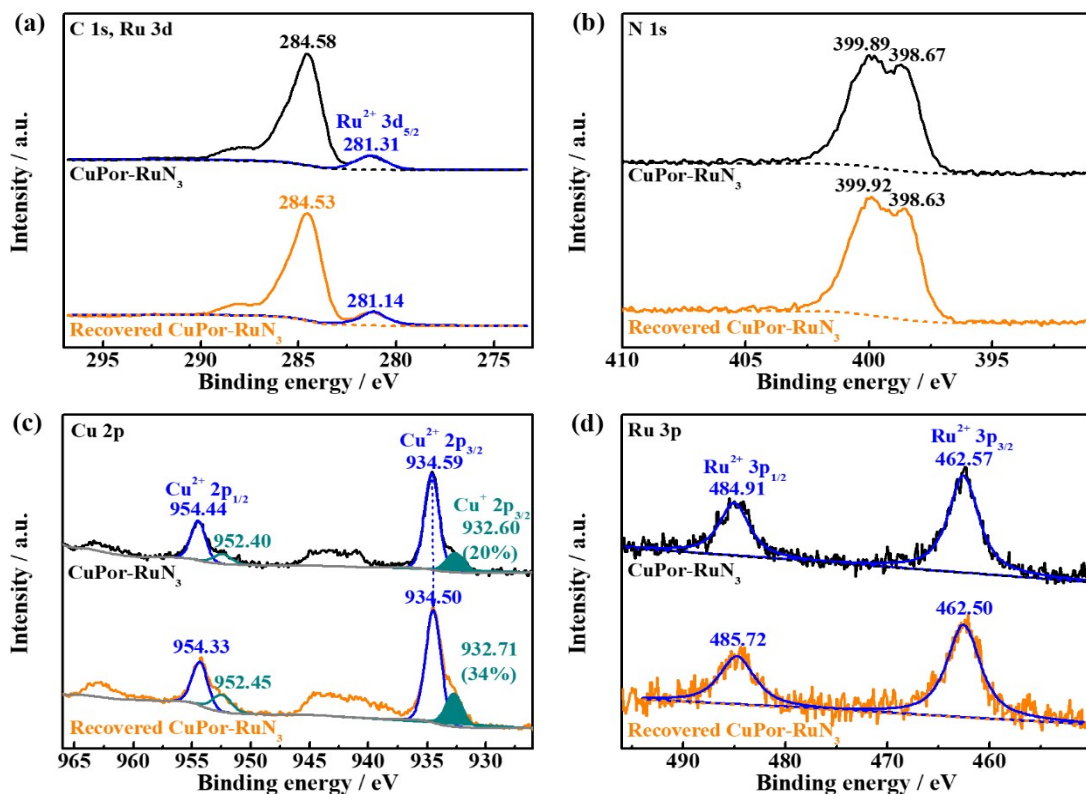

**Fig. S12** High-resolution XPS spectra of the CuPor-RuN<sub>3</sub> COP before and after the 20 h photoreaction. (a) C 1s & Ru 3d, (b) N 1s, (c) Cu 2p, (d) Ru 3p.

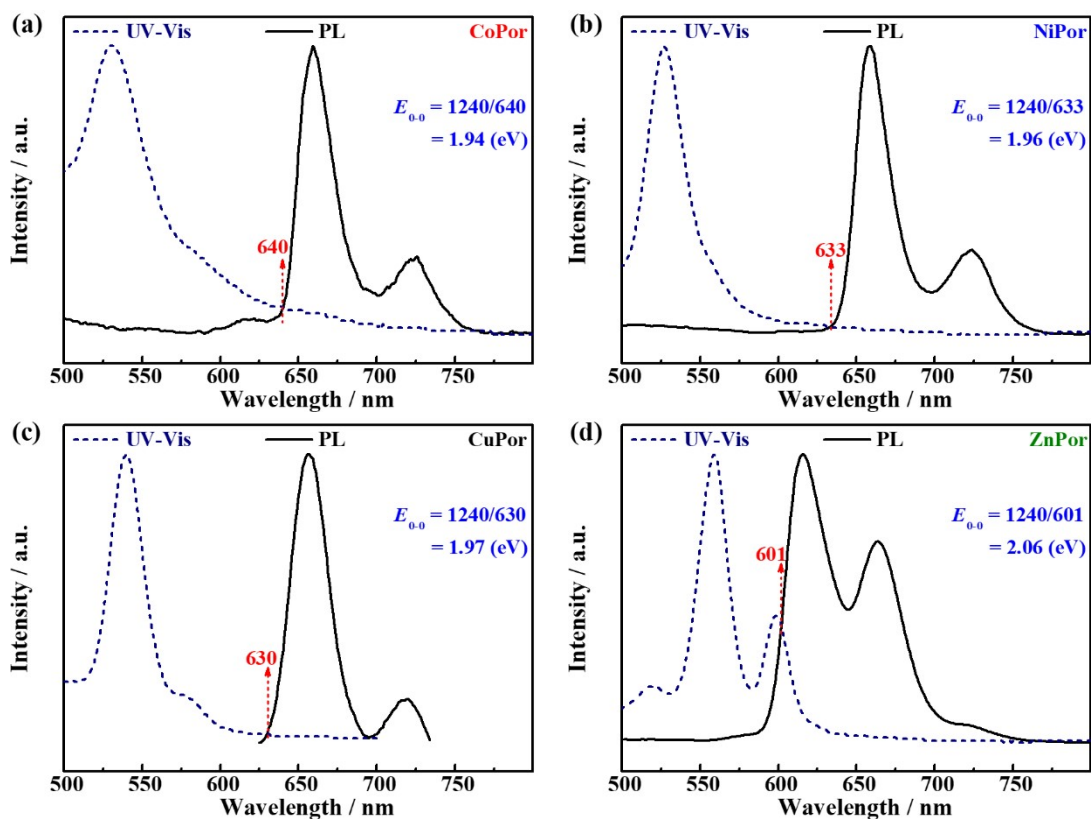

Fig. S13 Normalized emission/absorption spectra of various MPor monomers at  $\lambda_{\text{ex}} = 415$  nm.

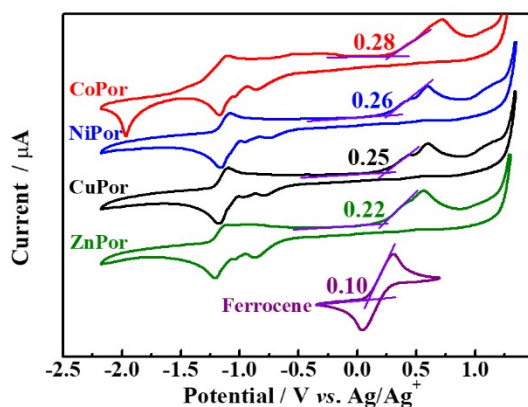

Fig. S14 CV plots of various MPor monomers and ferrocene reference.

The highest occupied molecular orbital (HOMO)-lowest unoccupied molecular orbital (LUMO) gap energies ( $E_{0.0}$ ) of MPor monomers can be estimated by the intersection point between their normalized absorption and emission spectra (Fig. S13) according to equation of  $E_{0.0}$  (eV) =  $1240/\lambda$  (nm). The oxidation potentials ( $E$ ) of ground-state monomers can be determined using cyclic voltammogram (CV) curves with ferrocene redox pair ( $\text{Fc}^+/\text{Fc}$ ) as reference (Fig. S14). Therefore, the  $E_{\text{HOMO}}$  and  $E_{\text{LUMO}}$  levels of those MPor monomers can be calculated using Eqs. 1 and 2.

$$E_{\text{HOMO}} = E_{\text{OX}} (\text{V vs. Ag/Ag}^+) - E_{1/2}(\text{Fc}^+/\text{Fc vs. Ag/Ag}^+) + E_{1/2}(\text{Fc}^+/\text{Fc vs. NHE}) \quad (1)$$

$$E_{\text{LUMO}} = (E_{\text{HOMO}} - E_{0.0}) \quad (2)$$



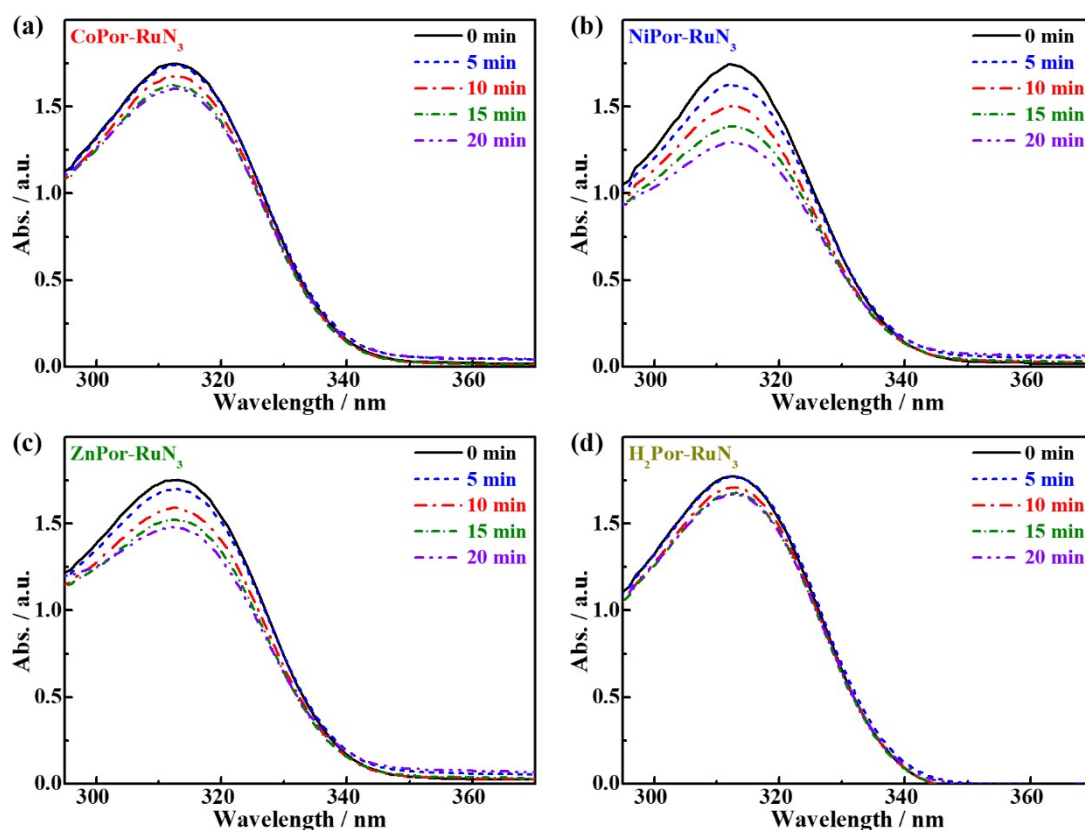

**Fig. S15** UV-Vis absorption spectra of the supernatant of various MPor-RuN<sub>3</sub> COP-containing BIH MeCN solutions (0.05 g L<sup>-1</sup>) under visible light illumination for different periods.

**Table S5** Energy band levels of the MPor and RuN<sub>3</sub> monomers.

| Sample                         | $E_{0-0}$ / eV | $E_{\text{HOMO}}$ / V vs. NHE | $E_{\text{LUMO}}$ / V vs. NHE |
|--------------------------------|----------------|-------------------------------|-------------------------------|
| CoPor                          | 1.94           | 0.92                          | -1.02                         |
| NiPor                          | 1.96           | 0.90                          | -1.06                         |
| CuPor                          | 1.97           | 0.89                          | -1.08                         |
| ZnPor                          | 2.06           | 0.86                          | -1.20                         |
| RuN <sub>3</sub> <sup>27</sup> | 2.70           | 0.62                          | -2.08                         |

## References

- 1 Y. Xie, Z. Fang, L. Li, H. Yang and T. F. Liu, *ACS Appl. Mater. Interfaces*, 2019, **11**, 27017-27023.
- 2 C. H. Dai, L. X. Zhong, X. Z. Gong, L. Zeng, C. Xue, S. Z. Li and B. Liu, *Green Chem.*, 2019, **21**, 6606-6610.
- 3 H. B. Zhang, J. Wei, J. C. Dong, G. G. Liu, L. Shi, P. F. An, G. X. Zhao, J. T. Kong, X. J. Wang, X. G. Meng, J. Zhang and J. H. Ye, *Angew. Chem. Int. Ed.*, 2016, **55**, 14310-14314.
- 4 K. M. Choi, D. Kim, B. Rungtaweivoranit, C. A. Trickett, J. T. D. Barmanbek, A. S. Alshammari, P. Yang and O. M. Yaghi, *J. Am. Chem. Soc.*, 2017, **139**, 356-362.
- 5 E. X. Chen, M. Qiu, Y. F. Zhang, Y. S. Zhu, L. Y. Liu, Y. Y. Sun, X. Bu, J. Zhang and Q. Lin, *Adv. Mater.*, 2018, **30**, 1704388.

- 6 H. Takeda, M. Ohashi, T. Tani, O. Ishitani and S. Inagaki, *Inorg. Chem.*, 2010, **49**, 4554-4559.
- 7 X. X. Yu, Z. Z. Yang, B. Qiu, S. E. Guo, P. Yang, B. Yu, H. Y. Zhang, Y. F. Zhao, X. Z. Yang, B. X. Han and Z. M. Liu, *Angew. Chem. Int. Ed.*, 2019, **58**, 632-636.
- 8 M. Lu, J. Liu, Q. Li, M. Zhang, M. Liu, J. L. Wang, D. Q. Yuan and Y. Q. Lan, *Angew. Chem. Int. Ed.*, 2019, **58**, 12392-12397.
- 9 L. J. Wang, R. L. Wang, X. Zhang, J. L. Mu, Z. Y. Zhou and Z. M. Su, *ChemSusChem*, 2020, **13**, 2973-2980.
- 10 S. Q. Zhang, L. N. Li, S. G. Zhao, Z. H. Sun and J. H. Luo, *Inorg. Chem.*, 2015, **54**, 8375-8379.
- 11 G. X. Zhao, H. Pang, G. G. Liu, P. Li, H. M. Liu, H. B. Zhang, L. Shi and J. H. Ye, *Appl. Catal., B*, 2017, **200**, 141-149.
- 12 G. L. Xu, H. B. Zhang, J. Wei, H. X. Zhang, X. Wu, Y. Li, C. S. Li, J. Zhang and J. H. Ye, *ACS Nano*, 2018, **12**, 5333-5340.
- 13 Y. L. Jiang, Y. Yu, X. Zhang, M. Weinert, X. L. Song, J. Ai, L. Han and H. H. Fei, *Angew. Chem. Int. Ed.*, 2021, **60**, 17388-17393.
- 14 L. Shi, T. Wang, H. B. Zhang, K. Chang and J. H. Ye, *Adv. Funct. Mater.*, 2015, **25**, 5360-5367.
- 15 D. R. Sun, W. J. Liu, Y. H. Fu, Z. X. Fang, F. X. Sun, X. Z. Fu, Y. F. Zhang and Z. H. Li, *Chem. Eur. J.*, 2014, **20**, 4780-4788.
- 16 F. Guo, Y. P. Wei, S. Q. Wang, X. Y. Zhang, F. M. Wang and W. Y. Sun, *J. Mater. Chem. A*, 2019, **7**, 26490-26495.
- 17 L. Y. Chen, Y. X. Wang, F. Y. Yu, X. S. Shen and C. Y. Duan, *J. Mater. Chem. A*, 2019, **7**, 11355-11361.
- 18 Y. P. Wei, Y. Liu, F. Guo, X. Y. Dao and W. Y. Sun, *Dalton Trans.*, 2019, **48**, 8221-8226.
- 19 H. P. Liang, A. Acharjya, D. A. Anito, S. Vogl, T. X. Wang, A. Thomas and B. H. Han, *ACS Catal.*, 2019, **9**, 3959-3968.
- 20 Z. W. Fu, X. Y. Wang, A. M. Gardner, X. Wang, S. Y. Chong, G. Neri, A. J. Cowan, L. J. Liu, X. B. Li, A. Vogel, R. Clowes, Matthew Bilton, L. J. Chen, R. S. Sprick and A. I. Cooper, *Chem. Sci.*, 2020, **11**, 543-550.
- 21 F. M. Wisser, M. Duguet, Q. Perrinet, A. C. Ghosh, M. Alves-Favaro, Y. Mohr, C. Lorentz, E. A. Quadrelli, R. Palkovits, D. Farrusseng, C. Mellot-Draznieks, V. Waele, and J. Canivet, *Angew. Chem. Int. Ed.*, 2020, **59**, 5116-5122.
- 22 Q. J. Zhi, J. Zhou, W. B. Liu, L. Gong, W. P. Liu, H. Y. Liu, K. Wang and J. Z. Jiang, *Small*, 2022, **18**, 2201314.
- 23 J. Q. Chen, H. Zhong, H. W. Lv, R. X. Liu and R. H. Wang, *ChemSusChem*, 2021, **14**, 2749-2756.
- 24 J. Jiang, Y. J. Chen and H. B. Ji, *J. CO<sub>2</sub> Util.*, 2022, **60**, 101972.
- 25 R. Cheng, C. C. Chung, S. Wang, B. Cao, M. Zhang, C. Chen, Z. Wang, M. Chen, S. Shen and S. P. Feng, *Mater. Today Phys.*, 2021, **17**, 100358.
- 26 W. J. Wang, K. H. Chen, Z. W. Yang, B. W. Peng and L. N. He, *J. Mater. Chem., A*, 2021, **9**, 16699-16705.
- 27 S. T. Chen, P. T. Kong, H. Niu, H. R. Liu, X. T. Wang, J. Zhang, R. J. Li, Y. Z. Guo and T. Y. Peng, *Chem. Eng. J.*, 2022, **431**, 133357.
